# Supplementary material
Source: PubMed Central journal article supplement (PMC1560339)
Supplement: rspb20053098s03.pdf [file rspb20053098s03.pdf]

# **ELECTRONIC APPENDIX**

This is the Electronic Appendix to the article

Prioritizing species conservation: does the Cape Verde kite exist?  
by

Jeff A. Johnson, Richard T. Watson and David P. Mindell

*Proc. R. Soc. B* (doi:10.1098/rspb.2005.3098)

Electronic appendices are refereed with the text; however, no attempt is made to impose a uniform editorial style on the electronic appendices.

## Electronic Appendix part A. Sample information.

| Common name <sup>1</sup>  | Museum catalogue no. | Location sampled                  | Date collected | Sex    | Museum <sup>2</sup> |
|---------------------------|----------------------|-----------------------------------|----------------|--------|---------------------|
| Black kite                | 78382                | Khinjar Lake, Sind, Pakistan      | 28-Feb-1934    | female | UMMZ                |
| Black kite                | 140425               | Palasbari, Assam, India           | 18-Dec-1951    | male   | UMMZ                |
| Black kite                | 96560                | Otsu, Honshu, Japan               | 5-Mar-1936     | male   | UMMZ                |
| Black kite                | 78383                | Parwali, Punjab, India            | 6-Mar-1933     | female | UMMZ                |
| Black kite                | 532081               | Normanton, Queensland Australia   | 3-May-1914     | male   | AMNH                |
| Black kite                | 532063               | Derby, N.W. Australia             | 9-May-1911     | female | AMNH                |
| Black kite                | 704655               | Kup, Papa New Guinea              | May-1952       | --     | AMNH                |
| Black kite                | 532051               | Makassar, S. Celebes              | Nov-1895       | female | AMNH                |
| Black kite                | 531936               | Algeria                           | 12-May-1909    | male   | AMNH                |
| Black kite                | 289860               | El Hajeb, Morocco                 | 22-Apr-1929    | female | AMNH                |
| Black kite                | 531883               | Istia d' Ombrona, Italy           | 1-Apr-1906     | female | AMNH                |
| Black kite                | 464875               | Kandahar, Afghanistan             | 18-Oct-1937    | female | AMNH                |
| Black kite                | 150962               | Barnasht, Giza, Egypt             | Mar-1953       | --     | UMMZ                |
| Black kite                | 1HC                  | original location unknown         | Oct-2003       | female | NBPC                |
| "Black kite" <sup>3</sup> | 532038               | Yemen, S.W. Arabia                | 13-Aug-1913    | male   | AMNH                |
| "Black kite" <sup>3</sup> | 789260               | Karamoja Dist., Uganda            | 4-Feb-1956     | --     | AMNH                |
| "Black kite" <sup>4</sup> | 824394               | Queensland, Australia             | 14-Jul-1979    | male   | AMNH                |
| Yellow-billed kite        | 388140               | Ebolora, Cameroon                 | 1939           | --     | AMNH                |
| Yellow-billed kite        | 531971               | Nigeria                           | 22-Dec-1919    | --     | AMNH                |
| Yellow-billed kite        | 257718               | Congo, Lulvabourg, Kasai Dist.    | 16-May-1923    | male   | AMNH                |
| Yellow-billed kite        | 531965               | Senegal, near Thies               | 30-Apr-1908    | male   | AMNH                |
| Yellow-billed kite        | 264858               | San Tome Islands                  | 29-Mar-1928    | female | AMNH                |
| Yellow-billed kite        | 532032               | N. Madagascar, near Diego Suarez  | 23-Nov-1916    | female | AMNH                |
| Yellow-billed kite        | --                   | South Africa                      | May-2003       | --     | WOB                 |
| Yellow-billed kite        | --                   | South Africa                      | May-2003       | --     | CRH                 |
| Red kite                  | 155642               | Salamanaca, Spain                 | 3-Dec-1957     | male   | UMMZ                |
| Red kite                  | 531856               | W. Rome, Italy                    | Apr-1900       | --     | AMNH                |
| Red kite                  | 531870               | Tenerife, Canary Islands          | Apr-1902       | male   | AMNH                |
| Red kite                  | 261698               | Progekoliu(?), Cloaice, S. Sweden | 1915           | --     | AMNH                |
| Red kite                  | 531852               | S. Hungary                        | 1910           | --     | AMNH                |
| Red kite                  | G00177               | Germany                           | Oct-2003       | male   | NBPC                |
| Cape Verde kite           | 531873               | Santo Antao, Cape Verde Is.       | 12-Dec-1897    | male   | AMNH                |
| Cape Verde kite           | 531874               | Rombos Is., Bravo                 | 25-Nov-1897    | --     | AMNH                |
| Cape Verde kite           | 265469               | Ribeira Brava, Santo Antao        | 13-Jan-1924    | male   | AMNH                |
| Cape Verde kite           | 265470               | Canto, Sao Nicolao                | 26-Feb-1924    | male   | AMNH                |
| Cape Verde kite           | 265471               | Canto, Sao Nicolao                | 28-Feb-1924    | male   | AMNH                |
| Cape Verde kite           | 265472               | Villa, Sao Nicolao                | 24-Feb-1924    | female | AMNH                |
| Cape Verde kite           | 265473               | Campa, Sao Nicolao                | 28-Feb-1924    | female | AMNH                |
| Cape Verde kite?          | F00022               | Maio or Broavista                 | Aug-2002       | female | NBPC                |
| Cape Verde kite?          | F00050               | Maio or Broavista                 | Aug-2002       | female | NBPC                |
| Cape Verde kite?          | F00053               | Maio or Broavista                 | Aug-2002       | female | NBPC                |
| Cape Verde kite?          | F00056               | Maio or Broavista                 | Aug-2002       | female | NBPC                |
| Cape Verde kite?          | F00059               | Maio or Broavista                 | Aug-2002       | male   | NBPC                |

<sup>1</sup> "Cape Verde kite?" represent the five birds recently trapped on Cape Verde of which taxon identity was determined in this study.

<sup>2</sup> AMNH, American Museum of Natural History, New York; UMMZ, University of Michigan Museum of Zoology, Ann Arbor, MI; NBPC, National Birds of Prey Centre, Gloucestershire, England; WOB, World of Birds Wildlife Sanctuary, South Africa; CRH, Centre for Rehabilitation of Wildlife, South Africa.

<sup>3</sup> Samples were identified as Yellow-billed kites in our phylogenetic analyses.

<sup>4</sup> Sample was identified as a Whistling kite (*Haliastur sphenurus*) in our phylogenetic analyses.

**Electronic Appendix part B.** Primers used in study to amplify mitochondrial gene regions.

| Primer ID                          | Sequence (5-3')                       |
|------------------------------------|---------------------------------------|
| <u>cytB</u>                        |                                       |
| L14996                             | AAC ATC TCA ATC TGA TGA AAC TTT GG    |
| H15332                             | GGC CGA GAA TAG GTT TGT GA            |
| L15279                             | CCC TCA TAG CAA CTG CCT TG            |
| H15646 <sup>1</sup>                | GGT GTA AAG TTT TCT GGG TCT CC        |
| L15560                             | GTG ACA AAA TTC CAT TCC ACC C         |
| H15828                             | GGA AGG TTA TTG TGC GCT GT            |
| L15748                             | CGC TAT CCT ACG CTC AAT CC            |
| H16064 <sup>1</sup>                | GGT CTT GTA AAC CAA ARA STG           |
| <u>ND2</u>                         |                                       |
| L5219 <sup>1</sup>                 | CCC ATA CCC CGA AAA TGA TG            |
| H299                               | ACT GTT AGG AGT AGT GAG GAG GTA GG    |
| L247                               | CAA TGA GAT ATC ACC CAA CTA GCC CA    |
| H5766                              | GGA TGA AAA GGC TAG GAC TTT TCG       |
| L5758.cv <sup>k</sup> <sup>2</sup> | GGG TGG ATA GGC CTA AAC CAA AC        |
| L5758.yb <sup>k</sup> <sup>2</sup> | GGG KGG ATG GGT CTA AAC CAA AC        |
| H852                               | GGT AGA AGA AAA GTC CTA GAA GGG AGA G |
| L768                               | ACT AAC AGG CTT CCT ACC TAA ATG AC    |
| H6313 <sup>1</sup>                 | CTC TTA TTT AAG GCT TTG AAG GC        |
| <u>Control Region</u>              |                                       |
| LCR                                | TGG TCT TGT AAR CCA AAR ANY GAA G     |
| HCR                                | TGG CCC TGA MRK AGG AAC CAG           |

<sup>1</sup> Sorenson *et al.* 1999 *Mol. Phylogenet. Evol.* **12** (2), 105-114.

<sup>2</sup> primer labeled “\*.ybk” was used for Yellow-billed kite samples, while all other samples used the primer labeled “\*.cvk” for this primer pair (L5758-H852).
